# Supplementary material for: CRISPR-mediated HDAC2 disruption identifies two distinct classes of target genes in human cells
Source: PLoS One. 2017 Oct 5;12(10):e0185627. doi: 10.1371/journal.pone.0185627 (PMC5628847; doi:10.1371/journal.pone.0185627)
Supplement: S6 Table — (XLSX) [file pone.0185627.s012.xlsx]

## Sheet: Sheet1
Gene	logFC	logCPM	PValue	FDR						Somanath et al, Supplemental Table S6, Differentially Expressed Genes in HDAC CRISPR lines
MFSD7	-1.24077	6.86784	7.04e-06	0.00178344
NEFM	-1.16221	9.23126	8.45e-12	1.5e-08
POU3F3	-0.998485	7.73804	8.68e-08	5.13e-05
EMILIN1	-0.954722	6.89379	0.00102118	0.0565796
LDLRAD2	-0.930371	7.66709	0.000953725	0.0563651
LMNTD2	-0.91112	7.71675	0.000119321	0.0123364
PLIN4	-0.808546	7.27869	0.00325162	0.136654
SLC39A4	-0.783027	8.04767	5.06e-05	0.00640413
BTG3	-0.770149	6.92084	0.000409589	0.0302584
COL6A2	-0.73759	7.46277	0.000158167	0.0140215
COL6A1	-0.719515	7.92306	2.43e-05	0.00358536
IL3RA	-0.700937	7.89038	0.0109797	0.263125
RNF157-AS1	-0.680968	8.4269	1.88e-05	0.00308004
MCM3AP	-0.671363	8.22869	4.98e-05	0.00640413
PKDREJ	-0.647523	6.7927	0.0102049	0.263125
GPT	-0.60625	8.91158	0.0033913	0.136654
MMEL1	-0.596286	8.71555	1.23e-05	0.00264056
AP1G2	-0.571506	8.73453	0.000680243	0.0442884
FOXH1	-0.570411	8.84927	0.00134562	0.07017
TONSL-AS1	-0.56059	9.72063	8.24e-05	0.00974489
CDKN2C	-0.553446	8.14838	0.000448278	0.0309075
PCGF3	-0.551832	8.00889	0.0127385	0.275431
SRPK3	-0.545747	7.68665	0.00815797	0.25275
CP	-0.536267	7.4162	0.00381431	0.145132
PPP1R16A	-0.529866	8.88296	0.00926607	0.25275
ASMTL-AS1	-0.523443	7.87587	0.00232337	0.105624
PAXIP1	-0.520222	7.12279	0.00827081	0.25275
EEF1A2	-0.514982	8.96749	0.00161119	0.079351
INO80E	-0.512798	7.99638	0.00895663	0.25275
SLC24A5	-0.504592	8.8031	0.000215368	0.0181832
BOP1	-0.499696	8.17776	0.001535	0.0777587
ATP2A1	-0.499026	7.656	0.00814803	0.25275
ZNF517	-0.46498	8.05519	0.00124039	0.0666429
CABP7	-0.459057	9.44597	0.000125242	0.0123364
RECQL4	-0.459005	9.39703	0.00045324	0.0309075
FOXD2	-0.454364	8.08863	0.00720747	0.236645
MMP19	-0.445013	7.69947	0.0106481	0.263125
HYI	-0.440356	8.19168	0.0114273	0.263125
TMED10P1	-0.437818	8.59972	0.000724402	0.0442884
STARD4-AS1	-0.429008	8.55141	0.00183245	0.0878091
LOC100289580	-0.415686	8.25937	0.00578093	0.197108
MTX1	-0.415376	9.00035	0.00484007	0.168264
MRAP	-0.412905	7.9514	0.0122451	0.270751
CFAP126	-0.410431	8.02726	0.0145992	0.287604
MCM3AP-AS1	-0.391656	10.3078	0.000141865	0.0132383
FANCA	-0.38399	10.3684	0.0156893	0.29341
MINA	-0.382397	8.33238	0.014211	0.285737
PRICKLE3	-0.381747	9.65529	0.00713375	0.236645
DGAT1	-0.381006	9.73384	0.000703932	0.0442884
LOC100289511	-0.378856	8.42901	0.0143433	0.285737
LOC101929718	-0.37804	10.0708	0.00224644	0.104814
SCRIB	-0.367101	8.45192	0.00845149	0.25275
HLA-C	-0.357994	8.02354	0.0106401	0.263125
DIMT1	-0.356378	8.14749	0.0136965	0.28237
LOC100133286	-0.354334	10.9791	0.000316237	0.0245849
TSR1	-0.321171	9.06008	0.00905429	0.25275
C22orf15	-0.3183	9.3418	0.0025268	0.112001
COL18A1	-0.277581	9.38523	0.0123329	0.270751
PINK1-AS	-0.226985	11.711	0.00381553	0.145132
MIF-AS1	-0.224973	14.9787	0.0131394	0.280676
SNX22	0.199661	12.8568	0.0140358	0.285737
POLG	0.206896	10.2232	0.0133141	0.281024
HSD17B1	0.229663	10.293	0.0123693	0.270751
LIMD1-AS1	0.235467	10.438	0.00913119	0.25275
TSTD2	0.245568	9.27355	0.0155642	0.29341
FBXO22-AS1	0.263316	9.77906	0.0123564	0.270751
CIRBP	0.276042	10.1415	0.00432938	0.156653
APOM	0.291514	9.21252	0.011212	0.263125
FANCI	0.291523	9.70092	0.009466	0.254287
PHKG2	0.307312	9.06813	0.00960927	0.254287
PRRC2B	0.315198	8.32345	0.0155939	0.29341
SH3BP5-AS1	0.334869	9.86137	0.00322421	0.136654
IDI2-AS1	0.348266	8.74523	0.00912281	0.25275
PITRM1-AS1	0.360528	10.3935	0.000100571	0.0111445
FAM71E1	0.360902	8.59982	0.00427273	0.156653
TP53BP1	0.366095	8.94335	0.000989599	0.0565796
HCG25	0.383027	8.30728	0.0153682	0.29341
SFT2D3	0.408726	8.74481	0.0111979	0.263125
MORF4L2	0.413919	7.3528	0.0113035	0.263125
ZC3H13	0.418192	7.61206	0.0105287	0.263125
MLF2	0.430967	7.13595	0.013645	0.28237
SLC15A3	0.453585	6.93276	0.0110437	0.263125
RPL37	0.457901	6.7837	0.0157214	0.29341
HMGB1	0.464413	7.26618	0.00458068	0.162431
BASP1	0.466879	10.4914	3.54e-08	3.14e-05
CCT5	0.485126	7.4103	0.00335947	0.136654
EVA1B	0.54149	6.72352	0.00923444	0.25275
CYBA	0.591396	7.28048	0.00881704	0.25275
CCDC152	0.597614	10.2511	6.16e-06	0.00178344
TFDP1	0.601323	7.02077	0.00384726	0.145132
COL4A2	0.640704	7.45345	1.34e-05	0.00264056
HOXB-AS3	0.683467	9.51961	5.72e-07	0.000253586
NSUN2	0.738555	6.80506	0.000318924	0.0245849
RAB40A	0.92613	6.58119	3.32e-06	0.0011782
GOLPH3	0.968424	6.43997	1.91e-05	0.00308004
